# Supplementary material
Source: publisher figshare collection journal article supplement (https://gsapubs.figshare.com/ndownloader/files/22398516)
Supplement: Supplementary file 1 [file 22398516]

## Sheet: Foglio1
	SUPPLEMENTAL TABLE. CHEMICAL COMPOSITIONS OF REPRESENTATIVE CA-AMPHIBOLES IN AND-2A METAMORPHIC CLASTS
	Koettlitz-Blue glacier area																															Skelton-Mulock glacier area												Britannia Range
		243.16			328.27			352.93			622.00			698.67			866.79			996.65			1048.38			1075.20			1122.22			169.2			177.68			622.68			965.26			185.36			285.28
		2 core	2 rim		1 core	1 rim		1 core	2 rim		1 core	1 rim		4 core	4 rim		6 core	6 rim		4 core	1 rim		2 core	2 rim		3 core	3 rim		5 core	5 rim		8 core	2 Rim		1	3		2 core	2 rim		3 core	4 rim		1 core	4 rim		1 core	1 rim
	SiO2	54.85	56.5315		51.3684	52.4888		50.2367	51.7583		51.2572	54.1527		54.5099	55.4945		53.6433	53.6518		51.3153	52.09		53.3479	55.9797		49.8584	50.8242		51.2383	53.4522		53.8462	56.3263		55.0035	53.9629		49.2664	51.7814		46.9056	51.8209		41.7496	40.489		43.315	42.8259
	TiO2	0.126945	0.068523		0.185763	0.117228		0.264249	0.303769		0.27426	0.225147		0.177012	0.108119		0.333676	0.225469		0.254618	0.205464		0.068558	0		0.519082	0.530442		0.402292	0.206493		0.205632	0.147015		0.079976	0.03926		0.119724	0.117396		0.19634	0.205989		1.10537	0.960988		0.579498	0.54098
	Al2O3	3.7107	2.10464		6.68747	4.58166		6.31262	4.65452		6.65081	3.61214		3.97294	2.47691		3.94523	2.6174		6.17938	5.37142		3.4279	1.81778		7.05168	6.95468		5.13168	5.20166		9.1751	6.23344		3.20904	3.31747		8.43056	4.35344		10.2784	6.5426		11.1026	12.9341		14.841	15.5015
	Cr2O3	0.25389	0.078312		0	0.19538		0	0.215578		0.09795	0		0.078672	0.127777		0.088326	0.186257		0.137102	0.19568		0.058764	0.048865		0.107734	0.068761		0.2453	0		0.303552	0		0.079976	0.11778		0	0.215226		0.166889	0.147135		0.078256	0.137284		0.206262	0.167212
	FeO	5.32193	5.01197		9.91388	9.57362		14.4065	14.2869		10.9214	9.76942		6.87397	6.89013		10.2851	12.2832		10.4002	9.90141		12.2523	9.01071		11.9781	11.8465		12.2454	11.3768		8.18611	8.57588		10.9367	10.4628		16.2026	14.0973		15.2262	12.8106		23.1931	22.8088		16.1179	16.6819
	MnO	0.458955	0.332826		0.156432	0.332146		0.156592	0.244975		0.72483	0.626496		0.206514	0.216238		0.186466	0.401923		0.342755	0.322872		0.499494	0.312736		0.4897	0.579557		1.17744	0.835805		0.186048	0.19602		0.309907	0.35334		0	0.39132		0.657739	0.608158		0.851034	0.921764		0.24555	0.34426
	MgO	19.3054	20.3513		15.8387	16.6952		13.0265	13.4638		15.192	17.0426		18.9009	19.2354		17.2825	15.4691		15.6688	16.0849		14.9261	18.5101		14.309	14.2826		14.3451	14.3857		12.7786	14.4761		16.565	16.7444		11.264	13.3636		10.6711	13.2029		5.39966	5.24621		9.60592	9.05896
	CaO	12.7726	12.618		12.4363	12.8755		11.764	11.9352		11.5189	11.4531		12.5875	13.0431		11.3254	12.4694		12.2217	12.3768		12.2915	11.4637		11.6157	11.709		11.8333	11.5341		11.4371	10.3303		12.5762	11.7682		12.2617	12.1603		11.8982	11.2117		11.1026	11.0808		10.5685	10.5934
	Na2O	0.54684	0.665652		0.68439	0.507988		1.2821	0.68593		1.05786	0.822276		0.68838	0.49145		0.873446	0.401923		1.08702	0.958832		0.842284	0.410466		1.51807	0.854601		1.10876	0.894803		1.62547	1.49955		0.939718	1.15817		1.42671	0.988083		1.42346	1.02995		1.64338	1.88275		2.07244	2.16392
	K2O	0.29295	0.127257		0.498627	0.322377		0.411054	0.440955		0.264465	0.19578		0.34419	0.186751		0.186466	0.313696		0.332962	0.332656		0.225262	0.175914		0.705168	0.569734		0.39248	0.432652		0.176256	0.225423		0.279916	0.225745		0.79816	0.352188		0.736275	0.510068		1.59447	1.60818		0.667896	0.481964
	TOTAL	97.6402	97.89		97.77	97.69		97.8602	97.99		97.9598	97.89		98.34	98.29		98.1498	98.03		97.93	97.84		97.94	97.73		98.1526	98.23		98.12	98.33		97.92	98.01		99.98	98.15		99.77	97.8202		98.1602	98.09		97.82	98.0698		98.22	98.36
	Si	7.67231	7.82851		7.30422	7.4858		7.29895	7.50125		7.26679	7.59533		7.58492	7.74765		7.4931	7.7001		7.31981	7.43262		7.67508	7.78188		7.17601	7.25184		7.38368	7.60211		7.70351	7.89889		7.69287	7.63236		7.14527	7.55989		6.90056	7.43586		6.47413	6.25633		6.30923	6.23797
	Altot	0.61173	0.343495		1.12071	0.770104		1.08095	0.79503		1.11126	0.597098		0.651542	0.407553		0.64949	0.442728		1.03885	0.903297		0.58123	0.297817		1.19617	1.16953		0.87155	0.871897		1.54703	1.03024		0.528966	0.553001		1.44105	0.74908		1.78213	1.10645		2.02912	2.35545		2.54775	2.66113
	AlIV	0.327691	0.171489		0.695777	0.514196		0.701047	0.498749		0.733213	0.404668		0.415077	0.25235		0.506903	0.2999		0.680187	0.567385		0.32492	0.218119		0.823995	0.748158		0.616324	0.397887		0.296493	0.101106		0.307131	0.367635		0.854733	0.440111		1.09944	0.564138		1.52587	1.74367		1.69077	1.76203
	AlVI	0.28404	0.172006		0.424937	0.255907		0.379899	0.296281		0.378049	0.19243		0.236465	0.155203		0.142587	0.142828		0.358662	0.335912		0.256311	0.0796978		0.372173	0.421368		0.255226	0.47401		1.25054	0.929131		0.221835	0.185365		0.586316	0.308969		0.682685	0.542311		0.503252	0.61178		0.856975	0.8991
	Ti	0.0133563	0.0071375		0.0198682	0.0125755		0.0288784	0.0331145		0.0292463	0.0237527		0.0185268	0.0113538		0.0350583	0.0243399		0.0273189	0.0220518		0.00741898	0		0.0561955	0.0569294		0.0436054	0.02209		0.0221281	0.0155073		0.00841354	0.00417672		0.0130608	0.0128919		0.0217264	0.0222326		0.128931	0.111692		0.0634907	0.0592705
	Fetot	0.62255	0.580435		1.1789	1.14184		1.75046	1.73161		1.29486	1.14591		0.799907	0.804458		1.20146	1.47427		1.24065	1.18152		1.47414	1.04754		1.44174	1.4136		1.47573	1.35315		0.979416	1.00575		1.27921	1.23756		1.96521	1.72121		1.87329	1.53727		3.00777	2.94741		1.96337	2.03206
	Fe3+	0	0.0138918		0.162559	0.0329894		0.163392	0.0811958		0.425675	0.463772		0.115444	0		0.605166	0.040769		0.123473	0.0109453		0	0.565562		0.167017	0.269401		0.153977	0.0392265		0	0		0	0.209307		0	0		0.0199151	0.0999244		0.237062	0.308075		0.627407	0.679423
	Fe2+	0.62255	0.566543		1.01634	1.10885		1.58707	1.65041		0.869185	0.682141		0.684463	0.804458		0.596294	1.43351		1.11718	1.17057		1.47414	0.481974		1.27472	1.1442		1.32175	1.31392		0.979416	1.00575		1.27921	1.02826		1.96521	1.72121		1.85338	1.43735		2.77071	2.63933		1.33596	1.35264
	Mn	0.0543758	0.0390384		0.0188404	0.0401224		0.0192706	0.0300719		0.0870381	0.074427		0.0243395	0.0255704		0.0220613	0.0488586		0.0414117	0.0390215		0.060867	0.0368229		0.0596981	0.0700422		0.143715	0.100684		0.0225447	0.0232831		0.0367126	0.0423295		0	0.0483904		0.0819594	0.0739143		0.11178	0.120639		0.0302945	0.0424726
	Mg	4.02568	4.20138		3.35745	3.54956		2.82149	2.90893		3.21081	3.56348		3.92076	4.00341		3.59883	3.3097		3.33196	3.4215		3.20126	3.83594		3.07019	3.03806		3.08172	3.05007		2.72537	3.02633		3.45383	3.53056		2.43541	2.90854		2.34034	2.82427		1.24827	1.20848		2.08587	1.96709
	Cr	0.0280782	0.00857415		0	0.0220306		0	0.024702		0.0109791	0		0.00865506	0.0141041		0.00975457	0.0211348		0.0154622	0.0220753		0.00668422	0.00537063		0.0122595	0.007757		0.0279479	0		0.0343353	0		0.00884365	0.0131707		0	0.0248433		0.0194116	0.0166923		0.00959447	0.0167717		0.0237537	0.0192565
	Ca	1.91426	1.87219		1.89471	1.96747		1.83132	1.85333		1.74973	1.72116		1.87667	1.95106		1.695	1.91747		1.8679	1.89219		1.8947	1.70746		1.79127	1.79007		1.82707	1.75762		1.75315	1.55216		1.8846	1.78338		1.90542	1.9022		1.87548	1.72372		1.84469	1.83453		1.64938	1.65326
	Na	0.148304	0.178723		0.18868	0.140465		0.361164	0.192743		0.290777	0.223608		0.185716	0.133028		0.236552	0.11184		0.300632	0.265261		0.234946	0.110631		0.423624	0.236421		0.309784	0.246741		0.450876	0.407719		0.254824	0.3176		0.401188	0.279691		0.406023	0.286539		0.494095	0.564053		0.585281	0.611114
	K	0.0522756	0.0224816		0.0904504	0.0586532		0.0761895	0.0815275		0.0478313	0.0350309		0.0610985	0.0332613		0.0332278	0.0574351		0.0605904	0.0605534		0.0413437	0.0311968		0.129477	0.103707		0.0721526	0.078499		0.0321687	0.0403282		0.0499439	0.0407323		0.147677	0.0655953		0.138183	0.0933707		0.315429	0.317011		0.124109	0.0895586
	XMg	0.866067	0.881176		0.767629	0.761969		0.640002	0.638015		0.786964	0.839331		0.851372	0.832679		0.85786	0.697777		0.7489	0.745088		0.684703	0.888378		0.706617	0.726417		0.699839	0.698918		0.735635	0.750563		0.729728	0.774447		0.553424	0.628228		0.558058	0.662723		0.310593	0.314069		0.609577	0.592546
	TOTAL	15.0469	14.9257		15.0756	15.1068		14.9837	15.0411		14.8564	14.7912		15.1321	15.1315		14.9745	15.1079		15.2446	15.2401		15.1777	14.8547		15.3566	15.138		15.2369	15.0829		14.8197	14.5925		14.9933	15.1549		15.2008	15.0582		15.1713	14.9272		15.6638	15.7324		15.3825	15.3732
	Gerya et al. (1997)
	T (°C)	417.605	379.973		476.964	451.962		471.11	444.517		466.583	408.594		438.548	412.309		440.577	418.146		486.564	469.817		427.911	381.665		514.23	488.989		476.777	431.914		392.39	331.718		409.643	432.873		508.364	436.651		540.089	445.864		621.741	651.176		627.738	636.014
	P (kb)	1.91212	1.32641		2.93951	2.27872		2.7951	2.29384		2.90093	1.95824		2.14942	1.64681		2.30889	1.71815		2.91306	2.60454		1.9849	1.54444		3.28801	3.14335		2.63811	2.40053		2.8872	1.69778		1.72399	2.06121		3.48473	2.16993		4.05925	2.71405		4.86569	5.49603		5.87156	6.08852
	Zenk and Schulz (2004)
	T (°C)	417.605	379.973		476.964	451.962		471.11	444.517		466.583	408.594		438.548	412.309		440.577	418.146		486.564	469.817		427.911	381.665		514.23	488.989		476.777	431.914		392.39	331.718		409.643	432.873		508.364	436.651		540.089	445.864		621.741	651.176		627.738	636.014
	P (kb)	2.02559	1.28692		3.39766	2.43025		3.19694	2.5134		3.44158	2.23921		2.31758	1.61312		2.63077	1.70498		3.29026	2.85533		2.08252	1.7184		3.7507	3.68148		2.90118	2.74908		3.64977	2.12458		1.76149	2.22294		4.056	2.3359		4.80382	3.19022		5.7107	6.57117		7.31635	7.61643
	Note: Each analysis is the average of at least ten analytical spots. T—temperature; P—pressure.
[truncated: 6 more columns]

## Sheet: Foglio2
		Koettlitz-Blue glacier area												Skelton-Mulock glacier area						Britannia Range
		23-12-03RF27B			18-12-03F7			23-12-03RF18			18-12-03F22B			21-01-06T2			17-12-03FR13			20-01-06T2			20-01-06T1			12-12-00T4			19-01-06T2
		2 core	2 rim		2 core	3 rim		1 core	1 rim		2 core	1 rim		5 core	5 rim		1 core	2 rim		2 core	2 rim		1 core	2 rim		2 core	2 rim		2 core	1 rim
	SiO2	47.9367	51.8108		50.0796	52.106		56.1639	57.7553		50.5463	53.504		51.0131	55.0885		47.6385	51.2797		41.0687	40.5615		44.0121	41.5451		42.9	41		43.4667	41.517
	TiO2	1.43987	0.763074		0.2441	0.274036		0	0		0.274176	0.29328		0.352152	0.048985		0.19532	0.087975		1.14837	1.0571		0.743812	0.693954		0.73	0.23		1.28275	0.558657
	Al2O3	9.19751	5.50783		6.75669	4.77606		1.54048	0.803518		7.10899	4.23301		6.02571	2.67458		7.70537	4.8484		12.6028	13.4879		10.9908	13.4002		14.68	18.53		12.3281	16.5931
	Cr2O3	0	0		0	0		0	0		0	0		0.205422	0.09797		0	0		0.30169	0.127244		0.048935	0.09774		0.03	0		0	0
	FeO	11.9989	10.6146		11.2579	9.80657		3.47345	2.07739		10.3599	9.44362		10.408	9.42471		15.1861	13.6654		22.1207	21.9643		19.3	19.9585		18.1	18.1		17.8019	17.7986
	MnO	0.35262	0.518499		1.21074	1.72251		0.117744	0.058794		0.460224	0.29328		0.352152	0.225331		0.312512	0.21505		0.807749	0.704736		0.577433	0.605988		0.11	0.26		0.332928	0.19602
	MgO	13.8207	16.2006		14.8803	16.3737		22.6068	23.4882		15.5595	16.7072		15.8371	17.2035		12.2856	14.1444		4.94382	5.217		7.93726	6.75383		8.06	6.79		9.12614	7.17433
	CaO	11.6854	11.27		11.4825	11.627		12.8537	13.2972		12.054	12.3764		11.9243	12.3736		12.2856	11.9646		11.4253	11.2464		11.5095	11.5529		11.76	11.32		11.202	11.6338
	Na2O	0.92073	0.78264		1.38649	0.929765		1.03026	0.421357		1.16525	0.567008		1.21297	0.529038		1.29888	1.0948		1.16783	1.70311		1.5072	1.52474		1.25	1.5		1.47859	1.40154
	K2O	0.60729	0.371754		0.351504	0.264249		0.333608	0.09799		0.39168	0.34216		0.469536	0.303707		0.761748	0.459425		1.70309	1.81078		1.24295	1.61271		0.91	0.68		0.88128	1.13692
	TOTAL	97.9598	97.8398		97.6498	97.8798		98.12	97.9998		97.92	97.76		97.8004	97.97		97.6698	97.7598		97.29	97.88		97.87	97.7498		98.53	98.41		97.9004	98.01
	Si	6.86346	7.29385		7.16604	7.36196		7.7111	7.86157		7.19085	7.57962		7.28827	7.78453		7.02582	7.42716		6.40626	6.27769		6.654	6.34404		6.33778	6.02319		6.44057	6.18667
	Altot	1.55203	0.913844		1.13948	0.795299		0.249271	0.128904		1.19194	0.706748		1.01462	0.445432		1.33933	0.827619		2.31695	2.46028		1.95837	2.41163		2.556	3.20829		2.15288	2.91415
	AlIV	1.13654	0.706149		0.833957	0.638035		0.249	0.138		0.809151	0.420376		0.711733	0.215472		0.974184	0.572844		1.59374	1.72231		1.346	1.65596		1.66222	1.97681		1.55943	1.81333
	AlVI	0.415488	0.207695		0.305525	0.157263		0	0		0.382787	0.286373		0.302892	0.22996		0.365143	0.254775		0.723209	0.737969		0.612365	0.755674		0.893783	1.23148		0.593449	1.10082
	Ti	0.155066	0.0808024		0.0262729	0.0291229		0	0		0.0293387	0.031251		0.0378437	0.00520661		0.0216673	0.00958424		0.134739	0.123062		0.0845851	0.0797072		0.0811192	0.0254151		0.142965	0.0626176
	Fetot	1.43672	1.24967		1.3472	1.15872		0.39882	0.236478		1.23255	1.11881		1.24356	1.11377		1.87302	1.65523		2.88568	2.84288		2.44019	2.54877		2.23622	2.22371		2.20592	2.21806
	Fe3+	0.459141	0.656593		0.506147	0.599954		0.214118	0.141082		0.300501	0.0967899		0.191278	0		0.168255	0.193133		0	0.0929817		0.136602	0.159482		0.343177	0.576194		0.531834	0.251264
	Fe2+	0.977577	0.593075		0.841054	0.558769		0.184702	0.0953959		0.932048	1.02202		1.05229	1.11377		1.70476	1.46209		2.88568	2.7499		2.30358	2.38929		1.89304	1.64751		1.67408	1.96679
	Mn	0.042763	0.061826		0.146742	0.206136		0.0136925	0.00677855		0.0554557	0.0351908		0.0426146	0.0269698		0.0390383	0.0263817		0.106723	0.0923844		0.0739431	0.0783784		0.0137644	0.0323521		0.0417834	0.024741
	Mg	2.94996	3.40001		3.17426	3.44875		4.62711	4.76626		3.29987	3.52838		3.37309	3.62409		2.70113	3.05403		1.14965	1.2037		1.78892	1.53747		1.77511	1.48704		2.01588	1.59376
	Cr	0	0		0	0		0	0		0	0		0.023204	0.0109456		0	0		0.0372072	0.0155703		0.0058493	0.0118003		0.00350409	0		0	0
	Ca	1.79263	1.69994		1.76046	1.76012		1.89086	1.93932		1.83735	1.87857		1.82534	1.87343		1.94136	1.85672		1.90955	1.86497		1.8644	1.8902		1.86148	1.78181		1.77843	1.85747
	Na	0.255594	0.213621		0.384662	0.254697		0.274252	0.111202		0.321406	0.155738		0.335997	0.144945		0.371408	0.307437		0.353197	0.511062		0.441799	0.451427		0.358042	0.427247		0.424776	0.404931
	K	0.110924	0.066765		0.0641661	0.0476295		0.0584322	0.0170159		0.0710851	0.0618368		0.0855791	0.0547498		0.14332	0.0848884		0.338912	0.357527		0.239729	0.314166		0.171505	0.127441		0.166586	0.21613
	XMg	0.751097	0.851474		0.790538	0.86057		0.961615	0.980378		0.779758	0.7754		0.762215	0.764921		0.613073	0.67625		0.284897	0.304456		0.437121	0.391537		0.483925	0.474403		0.546315	0.447616
	TOTAL	15.1591	14.9803		15.2093	15.0624		15.2235	15.0675		15.2298	15.0961		15.2701	15.0841		15.4561	15.249		15.6389	15.7491		15.5518	15.6676		15.3945	15.3365		15.3698	15.4785
	Gerya et al. (1997)
	T (°C)	544.343	471.628		506.014	467.426		425.866	387.292		503.893	436.54		492.825	402.061		540.657	471.266		628.719	649.436		593.81	637.621		624.83	660.351		610.822	647.405
	P (kb)	3.90166	2.79518		3.27729	2.62646		1.59997	1.20456		3.2703	2.1967		2.93013	1.65166		3.58404	2.60012		5.24238	5.59718		4.67823	5.52461		5.73771	6.97432		5.09225	6.36711
	Zenk and Schulz (2004)
	T (°C)	544.343	471.628		506.014	467.426		425.866	387.292		503.893	436.54		492.825	402.061		540.657	471.266		628.719	649.436		593.81	637.621		624.83	660.351		610.822	647.405
	P (kb)	4.62565	3.25448		3.83396	2.99231		1.4667	1.04695		3.80781	2.405		3.29478	1.68859		4.07986	2.87989		6.20812	6.68652		5.53747	6.64801		7.07383	8.8133		6.17917	7.90051
